# Supplementary material for: Exploring the biomedical competency of gamma-radiation aided hydroxyapatite and its composite fabricated with nano-cellulose and chitosan
Source: Royal Society of Chemistry journal article supplement (doi:10.1039/d3ra00476g), 2023-01-01
Supplement: d3ra00476g1.pdf [file d3ra00476g1.pdf]

## Exploring the biomedical competency of gamma-radiation aided hydroxyapatite and its composite fabricated with nano-cellulose and chitosan

Md. Sahadat Hossain,<sup>a</sup> Md. Aftab Ali Shaikh<sup>b</sup> \*, Shirin Akter Jahan<sup>a</sup>, Monika Mahmud<sup>a</sup>, Mashrafi Bin Mobarak<sup>a</sup>, Md. Saifur Rahaman<sup>d</sup>, Md. Najem Uddin<sup>c</sup> and Samina Ahmed<sup>a,c\*</sup>

\*Corresponding author: Samina Ahmed; email: [shanta\\_samina@yahoo.com](mailto:shanta_samina@yahoo.com)

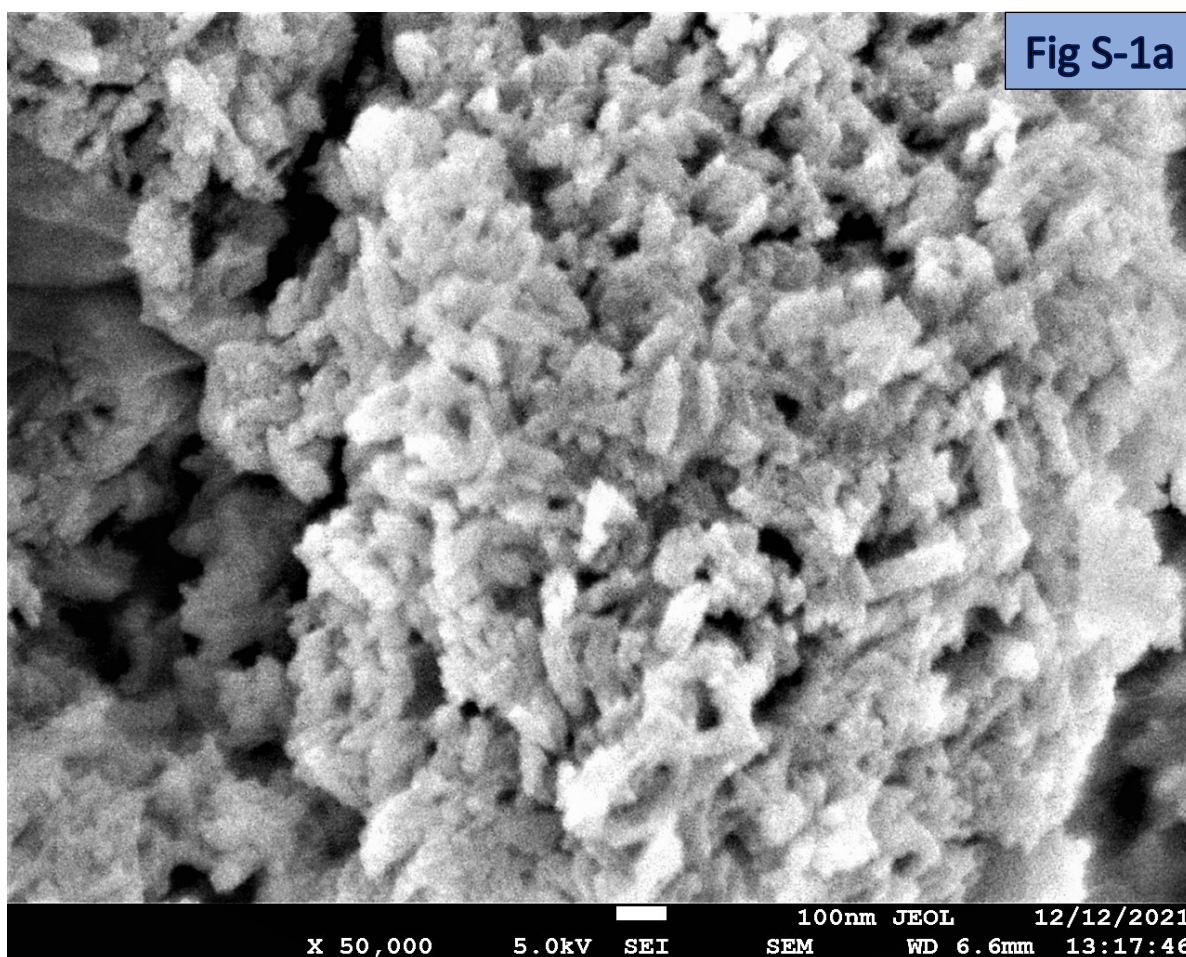

Fig S-1a: FE-SEM image of oven dried Hap but no  $\gamma$ -radiation applied

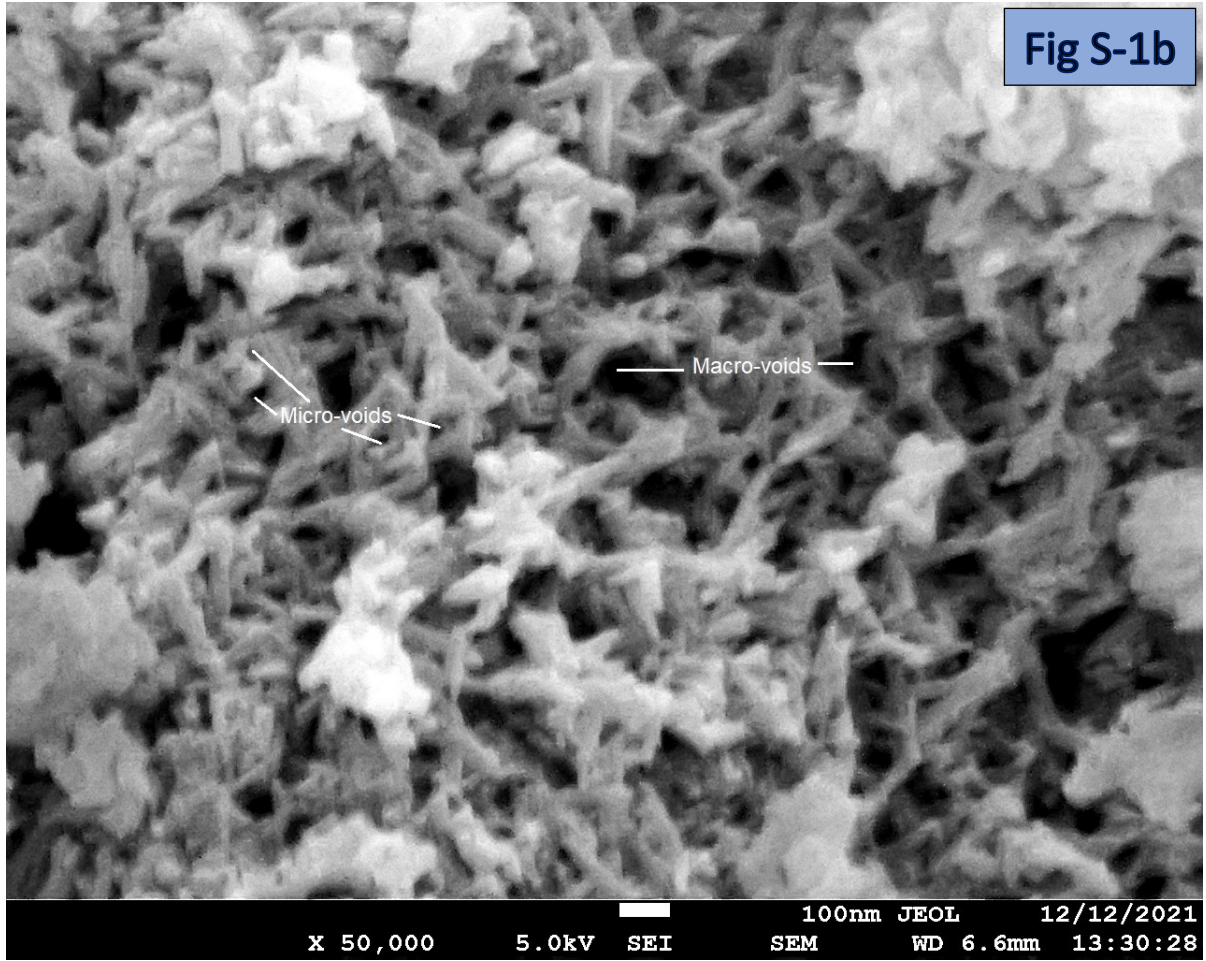

Fig S-1b: FE-SEM image of  $\gamma$ -radiated Hap

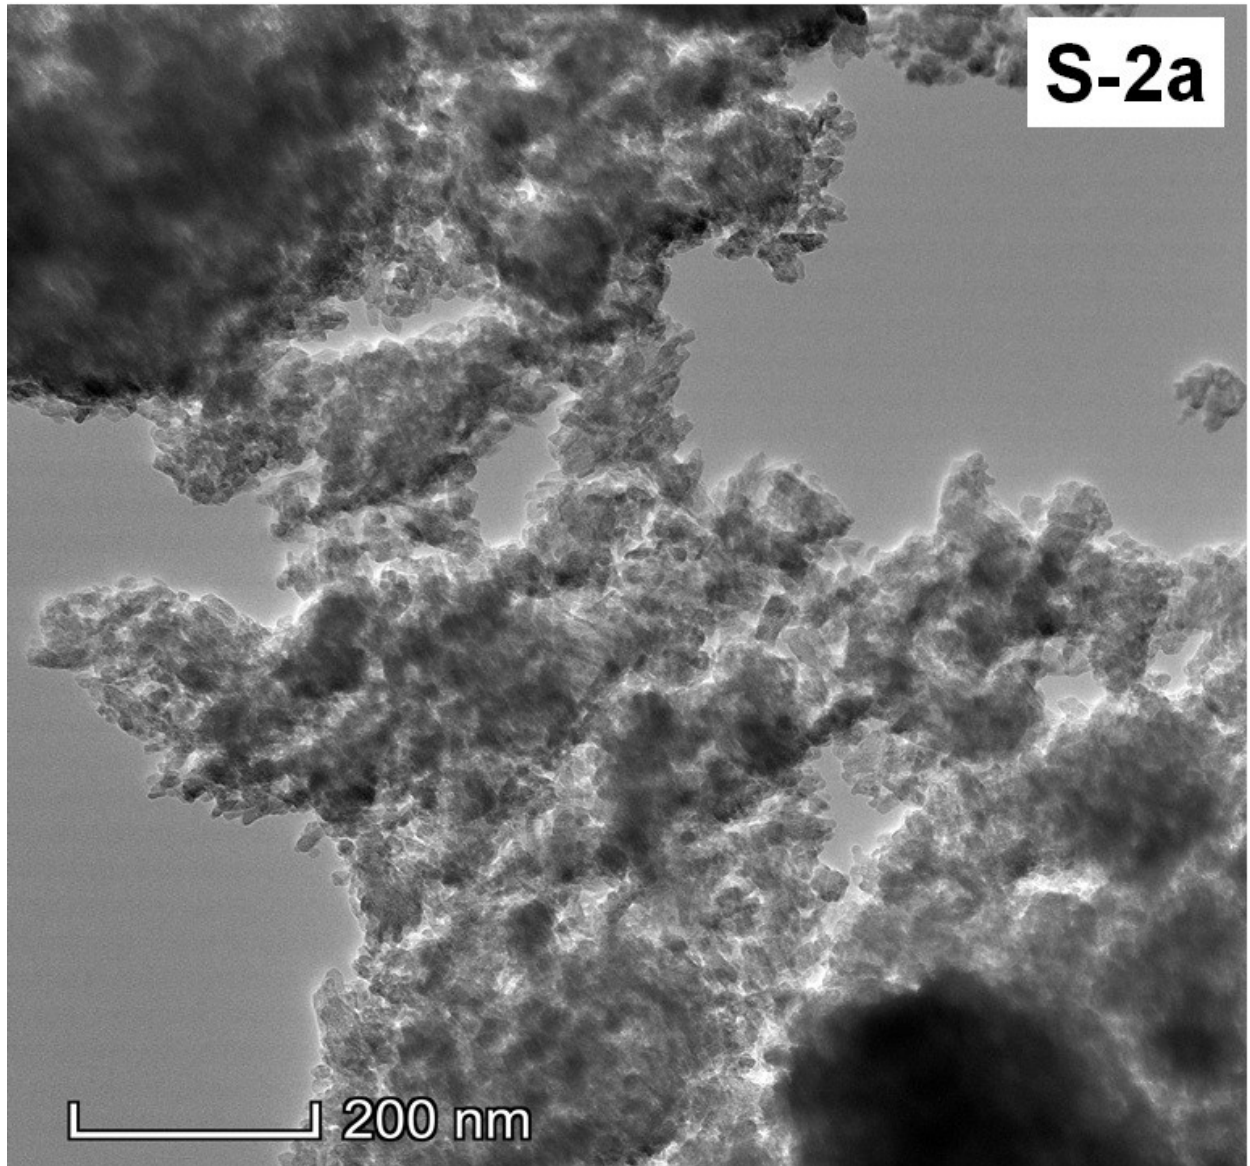

Fig S-2a: TEM image of oven dried Hap but no  $\gamma$ -radiation applied

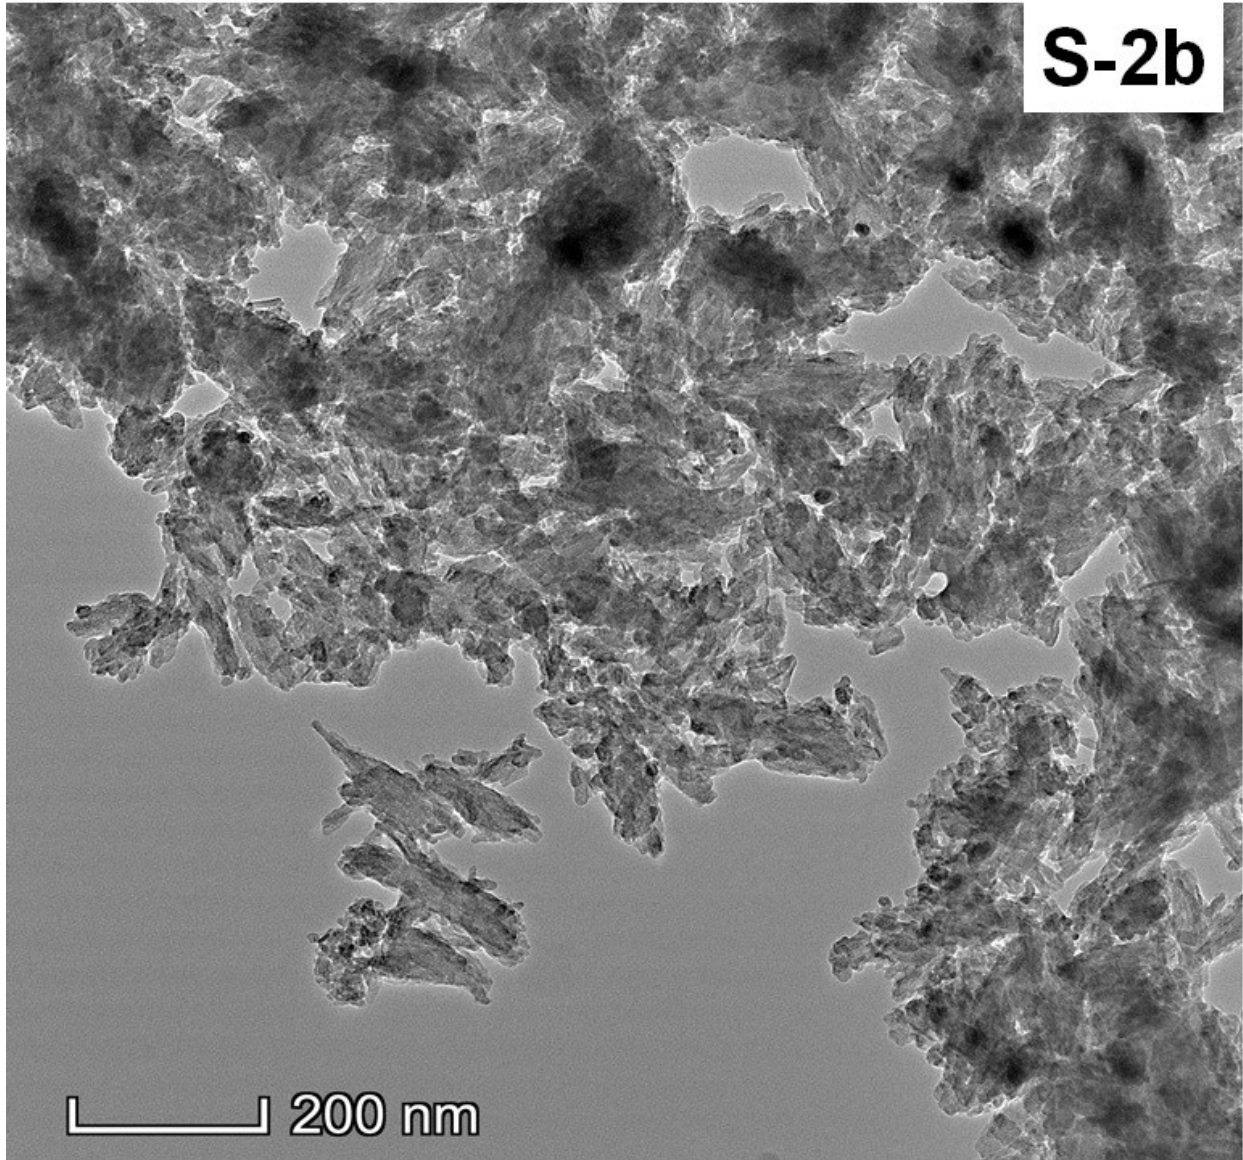

Fig S-2b: TEM image of  $\gamma$ -radiated Hap

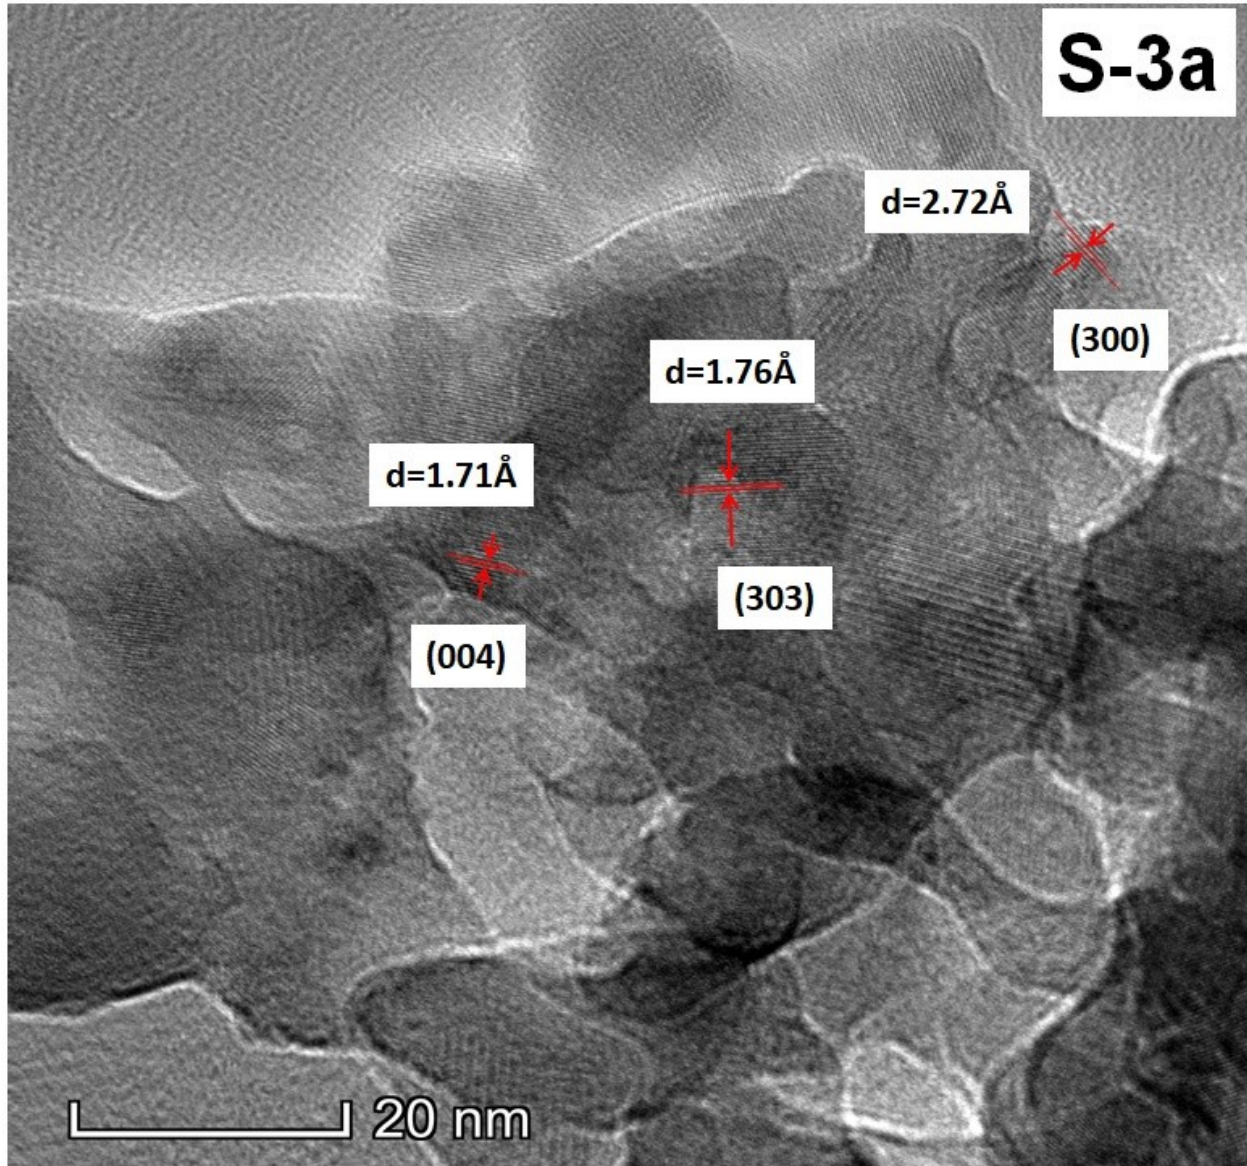

Fig S-3a: Lattice fringe of oven dried Hap but no  $\gamma$ -radiation applied

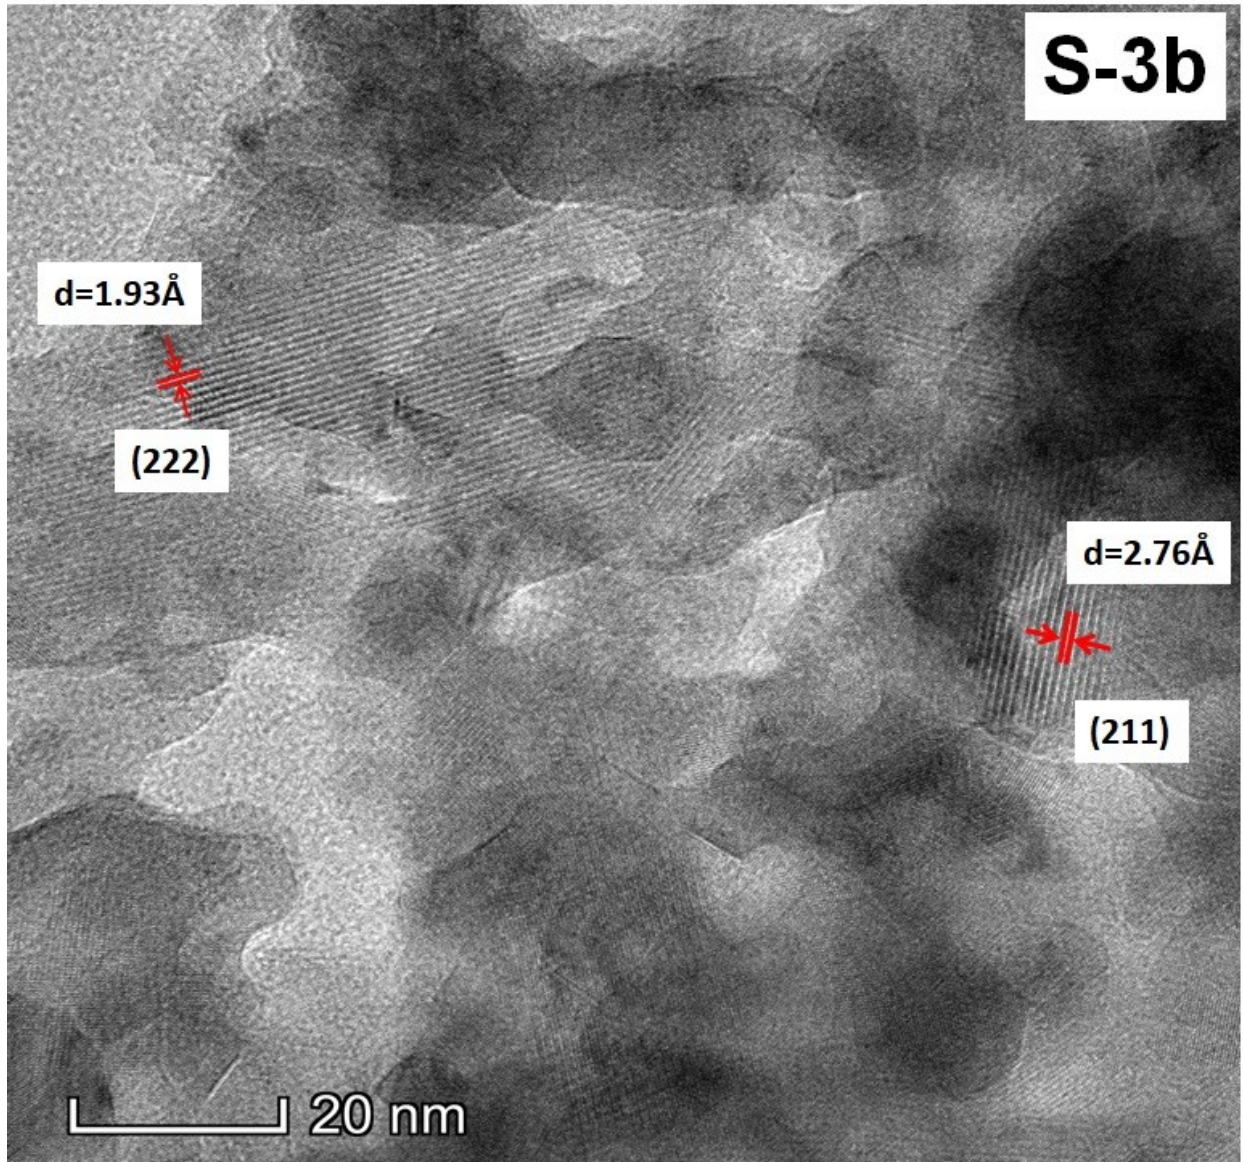

Fig S-3b: Lattice fringe of  $\gamma$ -radiated Hap

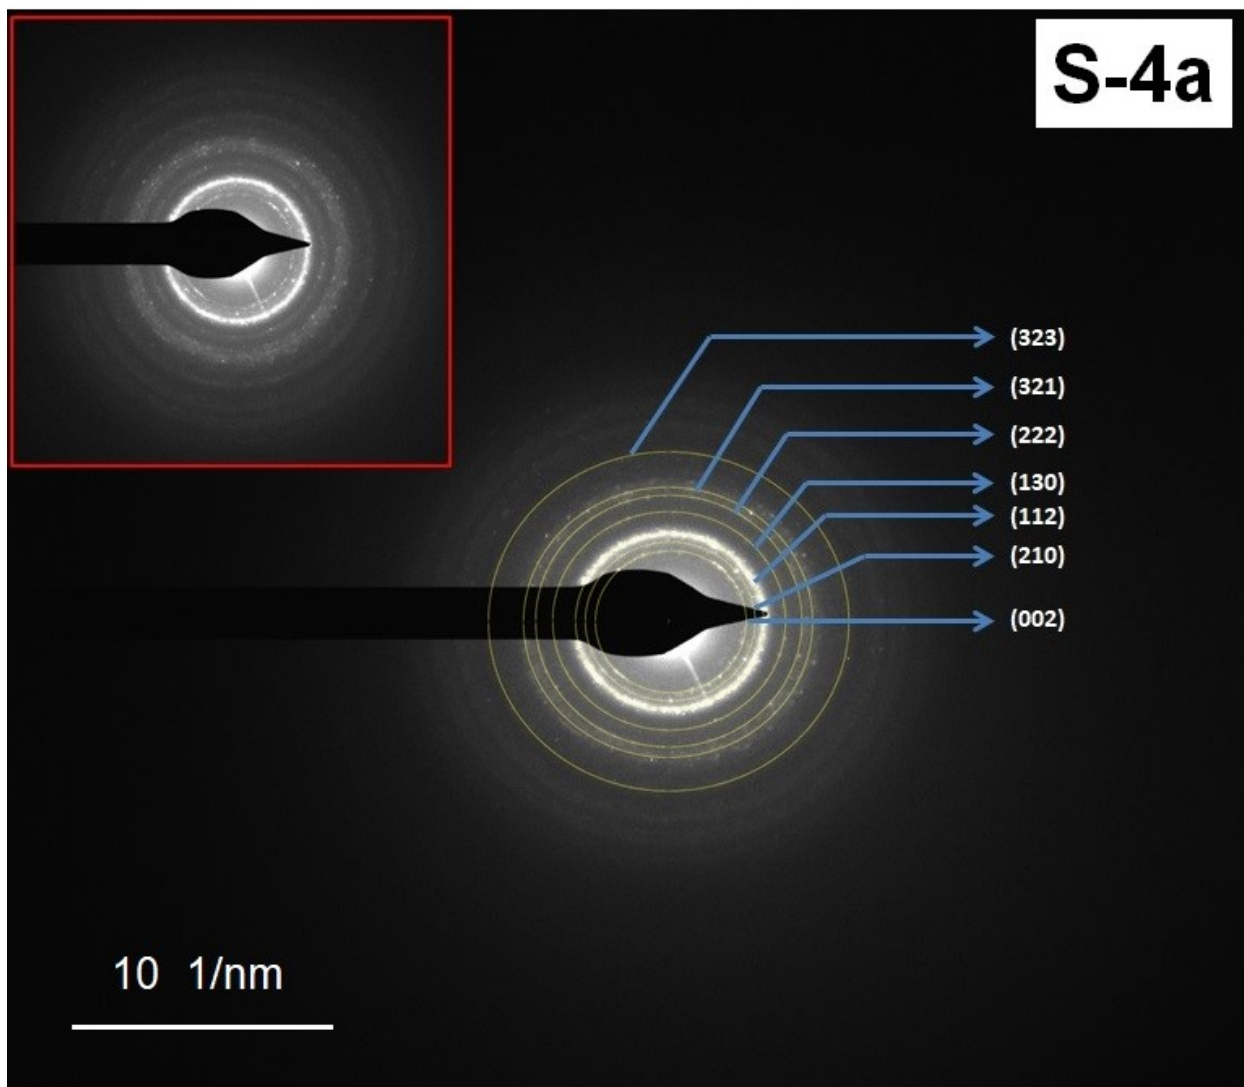

Fig S-4a: SAED ring image of oven dried Hap but no  $\gamma$ -radiation applied

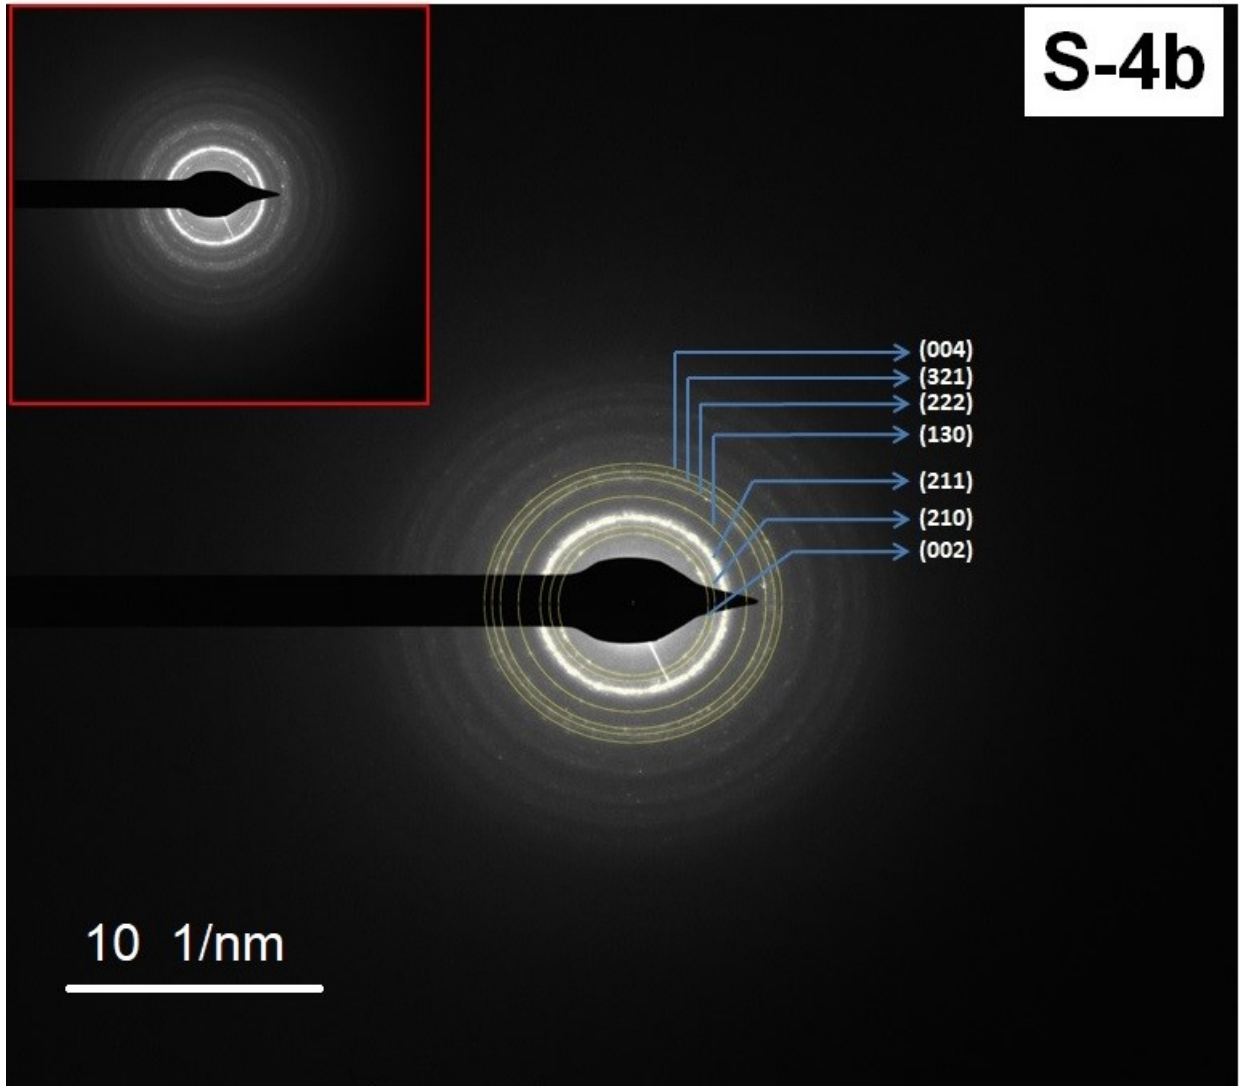

Fig S-4b: SAED images of  $\gamma$ -irradiated Hap



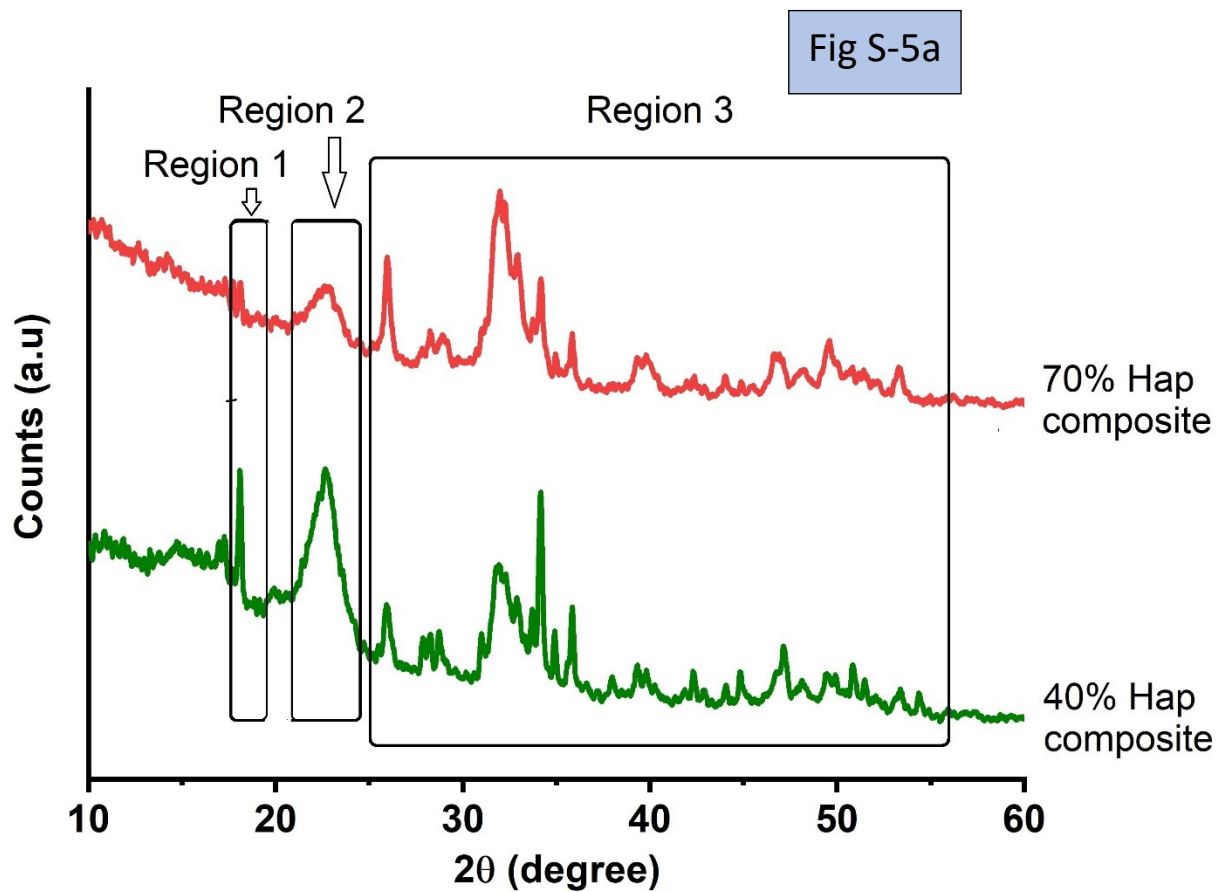

Fig S-5a: XRD pattern of  $\gamma$ -radiated Hap-CS-CNC composite

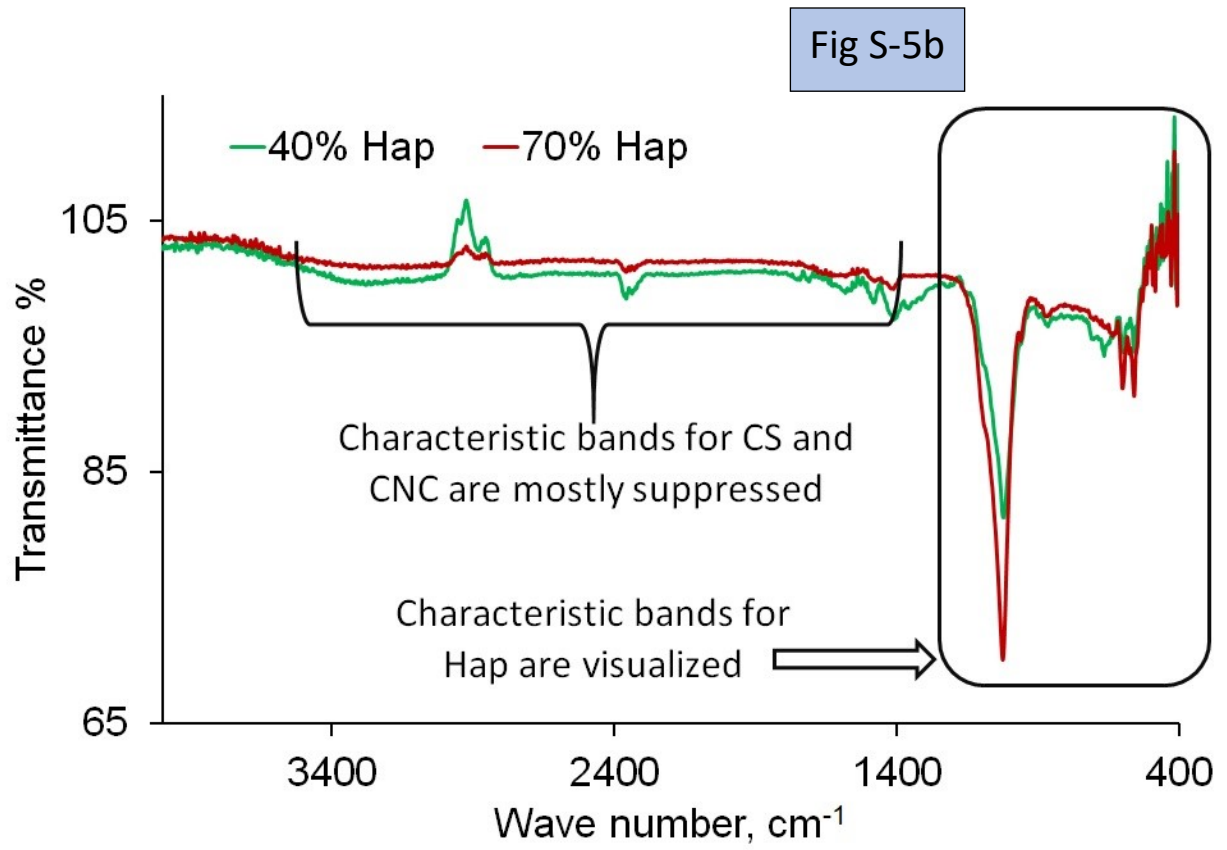

Fig S-5b: FTIR spectra of  $\gamma$ -radiated Hap –CS-CNC composite

Fig S-6

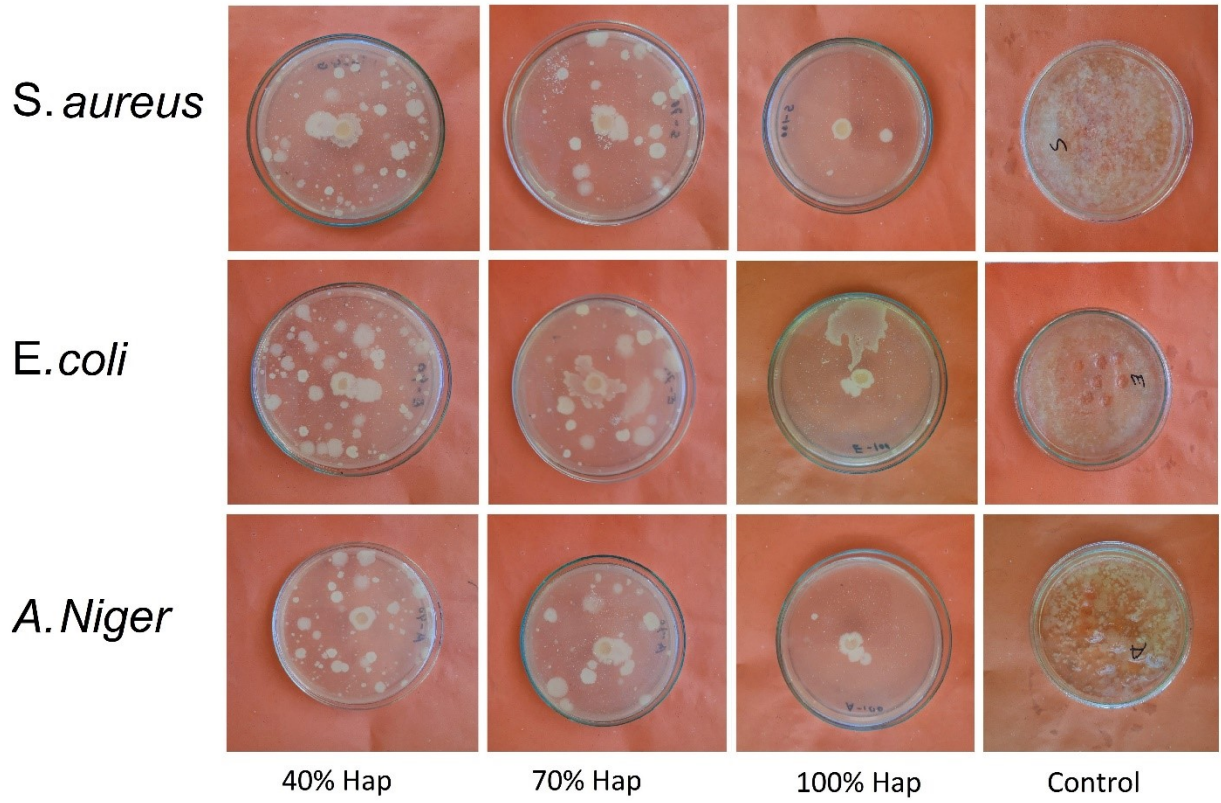

Fig S-6: Microscopic images showing antimicrobial activities of  $\gamma$ -radiated Hap –CS-CNC composites and controlled
